# Supplementary material for: CalkGH9T: A Glycoside Hydrolase Family 9 Enzyme from Clostridium alkalicellulosi
Source: MDPI journal article supplement (doi:10.3390/catal11081011), 2021-08-22
Supplement: s1 [file s1]

Supplementary Material

# CalkGH9T: A Glycoside Hydrolase Family 9 Enzyme from *Clostridium alkalicellulosi*

Paripok Phitsuwan, Sengthong Lee, Techly San and Khanok Ratanakhanokchai

## Protparam

### User-provided sequence:

```

10      20      30      40      50      60
MLKKINDKRRK YLVFLMIFCM LSFLEFLTPPV KVSADPEYNF AKALQMSLYF FDSNKCIGI

70      80      90      100     110     120
TGGRLLEWRGD CHVEDAEVPL IPMTEEFFGT NMSQAFIDEY RHILDPEGNG FLDLSGGYHD

130     140     150     160     170     180
AGDHIKFLGLP GTYAGSTLGW GYYEFRDSYV QTGTDDHIEE LLRWFNDFYL KVTFRDENGD

190     200     210     220     230     240
VIACYQVAE GNIDHNFNWP PELQRSVLL DFARPAYFAT AETPASDQAA GAAASLTINY

250     260     270     280     290     300
LNFKDTPEY AEECLDTAIA LYDFAVKHRG LGYDGGFYNS SYDYDEMSWA AVLHIAITGN

310     320     330     340     350     360
WDYIEDIVKT DDDGNYTGYP QRIIKDTNNR WQNIWVHCWD TVWGGVFAKL APITNTERDW

370     380     390     400     410     420
YIFRWNIYEW SGIPHEDPTD TTFLAKSPAG FSVVNPYGSA RYNTAAQLCA LVFTKETGRQ

430     440     450     460     470     480
DFAEWSKNQM EYIMGNNPMD RSYIVGYAPN SAKHPHHRAA HGSKTLSMLD PPEHRHTLWG

490     500     510     520     530     540
ALVGGPDLDL FHVDETYDYV YNEVAIDYNT AFVGALAGLY KYYGEGHYPL ENFPKADPI

550     560     570     580     590     600
DEYYIEAKLE QENKERTQVT LRLYNYSAYP PRFEEGMSVR YYFDISELLD AGQSIDDVIM

610     620     630     640     650     660
EVYYDENKAG YDGPAAEYKGP FKYDDAGTYV VEFDWTRGVV YGTREIQFAL MSGQDANWQS

670     680     690     700     710     720
NWDPTNDYSR QGIVKDEFTL TRRVVPVLYG ELVFGEFPVP VTVTPTPTPD PNVTPGPTPI

730     740     750     760     770     780
ESASLMVLYK SGVAISDTSD IRASINIRNT GTRPVNLSDV KIRYWFTKDG PGVQSFLCDY

790     800     810     820     830     840
AHIESSKVTG VIREIDNPVD LADSYLEIGF TSDAGVLGAG SQTGEIQFRI EKEGFLQYDE

850     860     870     880     890     900
TNDYSFNASA RDFIENPKIT AYVNSVLAYG VAPVETSGGN ILYGDLNGDG RINSTDYVLL

910     920     930     940
RRYILEIEIE FVPVTEAADL NGDGRINSTD VVLMRRYILE IIPQLPR

```

**Number of amino acids:** 947

**Molecular weight:** 107535.55

**Theoretical pI:** 4.52

**Total number of negatively charged residues (Asp + Glu):** 143

**Total number of positively charged residues (Arg + Lys):** 75

**Figure S1.** A translated amino acid sequence and a calculated molecular weight and a pI value of *CalkGH9T* analysed by ProtParam online tool.

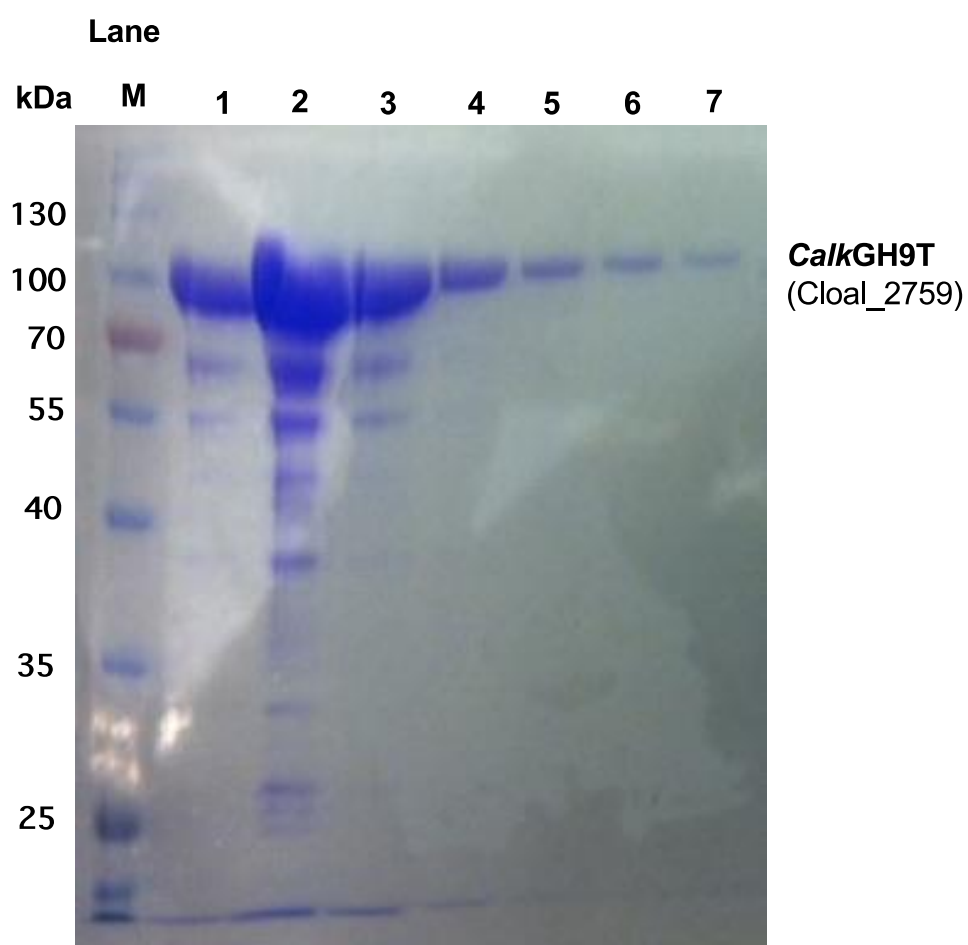

**Figure S2.** 10% SDS-PAGE analysis of *CalkGH9T* expression and purification. Lane: M, molecular weight marker (PageRuler™ prestained protein ladder, 10 to 180 kDa). Lane: 1-7, the eluted proteins from 2-mL collected fractions. Each well was loaded with 20  $\mu$ L of individual eluted protein fractions.

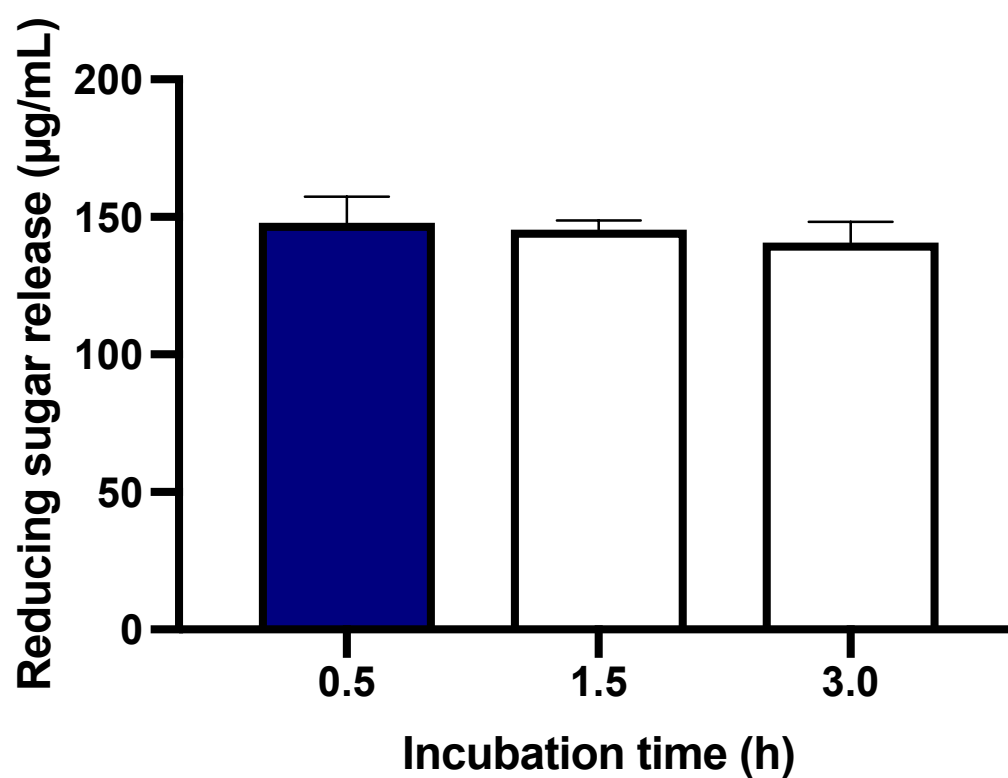

**Figure S3.** Reducing sugar release from RAC by *CalkGH9T*. Values are means and bars represent the standard deviations for three independent experiments.

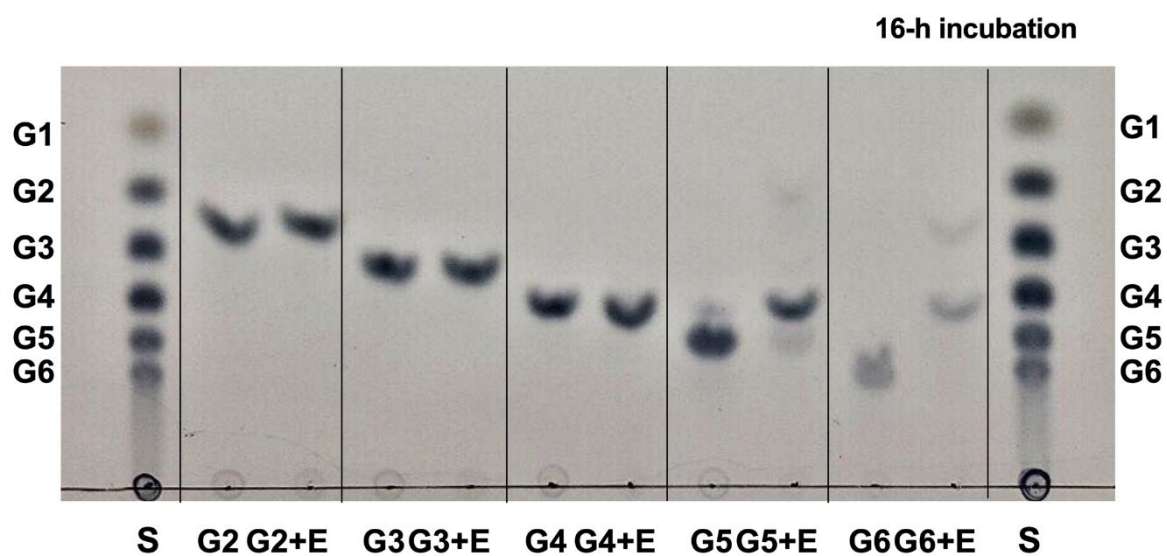

**Figure S4.** TLC analysis of hydrolysis products generated by 0.25  $\mu\text{M}$  *CalkGH9T* using cellodextrins with a degree of polymerization of 2–6 (G2–G6) as the substrates for 16-h incubation. S, standards of glucose and cellodextrins with a degree of polymerization of 2–6 (G2–G6). E, *CalkGH9T*. G2, G3, G4, G5, and G6 represent a reaction control (a reaction mixture containing a substrate and a denatured enzyme). G2+E, G3+E, G4+E, G5+E, and G6+E represent enzymatic reactions. The enzymatic reactions were performed at pH 7.4 and 55  $^{\circ}\text{C}$ .
